# Supplementary material for: Potential Role of Extracellular ATP Released by Bacteria in Bladder Infection and Contractility
Source: PubMed Central journal article supplement (PMC6731529; doi:10.1128/msphere.00439-19), 2019-09-04
Supplement: mSphere.00439-19-st001.pdf [file mSphere.00439-19-st001.pdf]

| <b>Primer</b>                                                   | <b>Primer Pair ID</b> | <b>Gene Name</b>                         | <b>Gene Symbol</b> | <b>Gene ID</b> | <b>Exons</b> |
|-----------------------------------------------------------------|-----------------------|------------------------------------------|--------------------|----------------|--------------|
| <b><i>GAPDH</i></b><br>Sigma 1235                               | H_GAPDH_1             | Glyceraldehyde-3-phosphate dehydrogenase | GAPDH              | 2597           | 9-10         |
| <b><i>MAOA</i></b><br>Sigma 1257                                | H_MAOA_1              | Monoamine oxidase A                      | MAOA               | 4128           | 3-5          |
| <b><i>MAOB</i></b><br>Sigma 1257                                | H_MAOB_1              | Monoamine oxidase B                      | MAOB               | 4129           | 12-13        |
| <b><i>TNF</i></b><br>ThermoFisher Scientific<br>Hs00174128_m1   | H-TNF-alpha           | Tumor necrosis factor                    | TNF- $\alpha$      | 7124           | 3-4          |
| <b><i>ACTA2</i></b><br>ThermoFisher Scientific<br>Hs00426835_g1 | H-ACTA2               | Actin, alpha 2, smooth muscle, aorta     | ACTA2              | 11475          | 2-3          |
